# Supplementary material for: Characterizing the limits of shallow shotgun metagenomics for taxonomic profiling of human gut microbiota in clinical studies
Source: Research Square preprint supplement (doi:10.21203/rs.3.rs-1306026/v1), 2022-07-15
Supplement: Supplementary file 1 [file 5b9b6ddc6a9bba1387a2632c.xlsx]

## Sheet: Loomba2017
taxa

## Sheet: Qin2014.discovery
taxa

## Sheet: Qin2014.validation
taxa
