# Supplementary material for: Characterizing the limits of shallow shotgun metagenomics for taxonomic profiling of human gut microbiota in clinical studies
Source: Research Square preprint supplement (doi:10.21203/rs.3.rs-1306026/v1), 2022-07-15
Supplement: Supplementary file 1 [file 30bd10ac1318e63d9bd474ed.pdf]

### **Additional file 1 — additional\_file\_1.xlsx**

Biomarkers discovery : differentially abundant taxa between the clinical groups of interest, as identified by a two-sided Wilcoxon test with Benjamini-Hochberg correction for multiple hypothesis testing.

### **Additional file 2 — additional\_file\_2.png**

Number of biomarkers identified in Loomba-2017 and Qin-2014, relatively to their abundance and the sequencing depth.

### **Additional file 3 — additional\_file\_3.png**

Effect of filtering strategies on the recovery of differences between patients groups in different studies: significance of inter-group difference regarding Shannon diversity index for  $\alpha$ -diversity (A), PERMANOVA analysis for  $\beta$ -diversity (B). AUC corresponding to random forest classification (C) was performed in Loomba-2017 and Qin-2014, with a split between discovery and validation cohorts in Qin-2014 as performed on the original paper of this study. Error bars represent standard deviation for 10 repetitions of training process in the classification model.
